# Supplementary material for: Effects of Oxidative Stress on the Autophagy and Apoptosis of Granulosa Cells in Broody Geese
Source: MDPI journal article supplement (doi:10.3390/ijms24032154), 2023-01-21
Supplement: s1 [file s1]

Supplementary Materials:

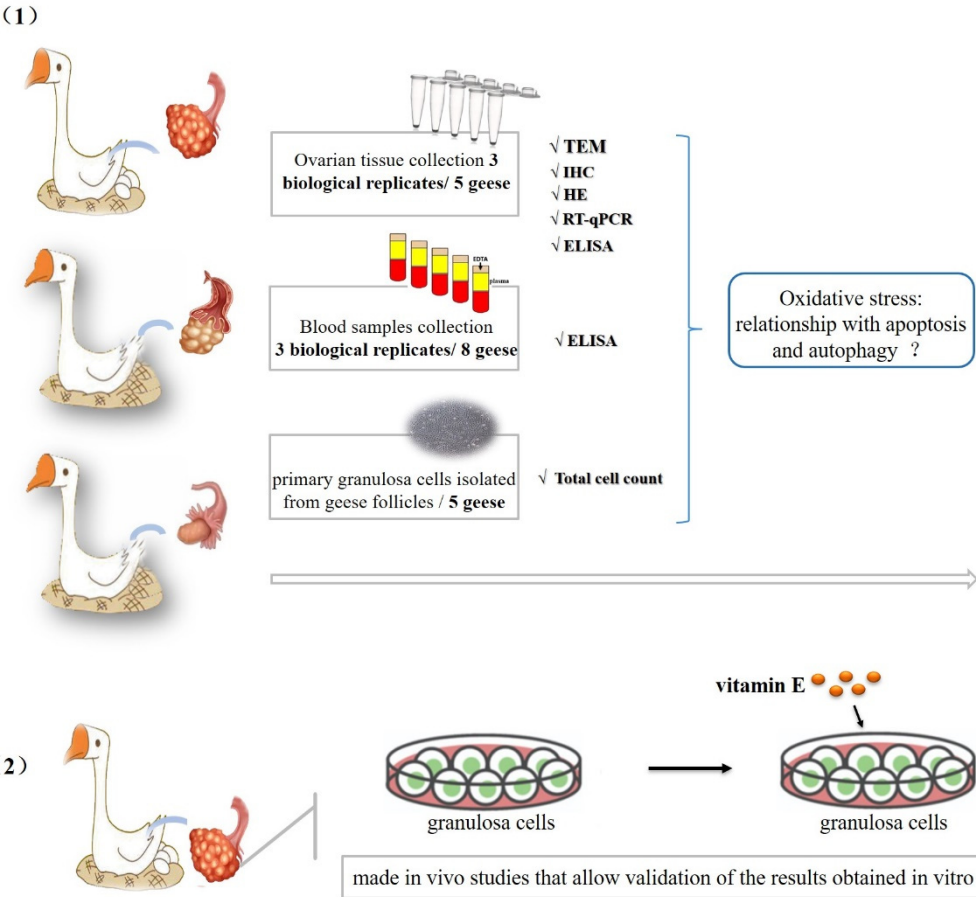

**Figure S1.** Experimental design and workflow for assessing the effects of oxidative stress on the autophagy and apoptosis of GCs in broody geese.
